# Supplementary material for: Bio-based semi-aromatic polyamide/functional clay nanocomposites: preparation and properties
Source: Royal Society of Chemistry journal article supplement (doi:10.1039/c4ra02949f), 2014-01-01
Supplement: c4ra02949f1.pdf [file c4ra02949f1.pdf]

## Bio-based Semi-aromatic Polyamide/Functional Clay Nanocomposites: Preparation and Properties

Meisam Shabanian,<sup>b,c</sup> Nianjun Kang,<sup>a</sup> Jianwen Liu,<sup>b</sup> Udo Wagenknecht,<sup>b</sup> Gert Heinrich<sup>b,d</sup> De-Yi Wang,<sup>\*a</sup>

### Supplementary Material

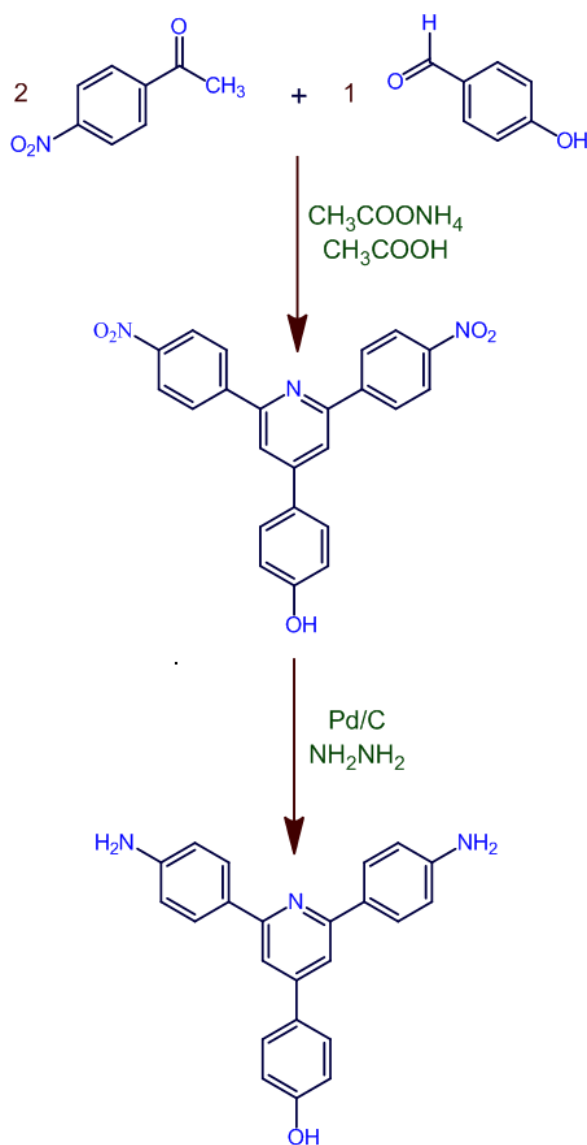

Scheme S1. Synthesis of the diamine

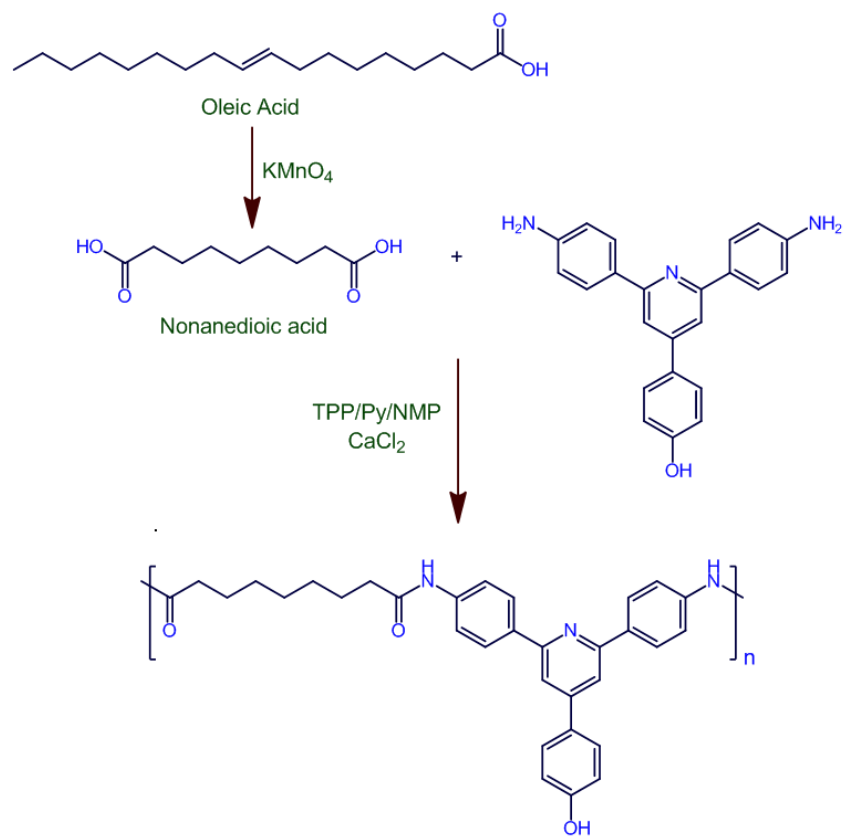

Scheme S2. Polycondensation reaction of the diacid derived from oleic acid with the diamine
